# Supplementary material for: Disruption of the autism gene and chromatin regulator KDM5A alters hippocampal cell identity
Source: PubMed Central journal article supplement — Sci Adv. 2023 Nov 22;9(47):eadi0074. doi: 10.1126/sciadv.adi0074 (PMC10664992; doi:10.1126/sciadv.adi0074), 2023-11-22

Supplementary Materials for

**Disruption of the autism gene and chromatin regulator KDM5A alters hippocampal cell identity**

Lauretta El Hayek *et al.*

Corresponding author: Maria H. Chahrour, maria.chahrour@utsouthwestern.edu

*Sci. Adv.* **9**, eadi0074 (2023)  
DOI: 10.1126/sciadv.adi0074

**The PDF file includes:**

Figs. S1 to S9  
Legends for tables S1 to S3

**Other Supplementary Material for this manuscript includes the following:**

Tables S1 to S3

**Fig. S1.**

**Quality control metrics.** (A) Number of UMIs per nucleus in each sample. All nuclei sequenced had  $\geq 500$  UMIs. (B) Number of genes per nucleus in each sample. All nuclei sequenced had  $> 300$  genes. (C) Number of UMIs per nucleus in each cluster. (D) Number of genes per nucleus in each cluster. (E) Scatter plot showing the number of genes (y axis) versus the number of UMIs (x axis). KO, knockout (*Kdm5a*<sup>-/-</sup>).

**Fig. S2.**

**Cell identities of the 24 clusters identified by single-nucleus RNA-seq from WT and *Kdm5a*<sup>-/-</sup> hippocampi.** (A) UMAP plot of WT and *Kdm5a*<sup>-/-</sup> nuclei with each cluster annotated with its respective cell identity. (B) Scaled expression of *Kdm5a* across clusters. (C) Dot plot showing the relative expression of marker genes for specific hippocampal cell subtypes. The dot size represents the percentage of nuclei expressing each marker gene and the dot color intensity represents the average expression of the gene (light color, low expression; dark color, high expression).

**Fig. S3.**

**Cell type proportions from each WT and *Kdm5a*<sup>-/-</sup> biological replicate.** (A) UMAP of the 24 hippocampal clusters identified by snRNA-seq to visualize changes in cell proportion within specific clusters between WT (purple) and *Kdm5a*<sup>-/-</sup> (yellow) cells. WT cells are superimposed on *Kdm5a*<sup>-/-</sup> cells (left) and vice versa (right). (B) Bar graph representing the proportion of cell types from the major groups in each biological replicate. (C) Bar graph representing the proportion of cell types from each cluster belonging to a biological replicate (CA1.1, \*\**P*=0.0023; CA1.4, \*\*\**P*<0.0001; CA2, #*P*=0.3216; CA3.4, \*\*\**P*<0.0001; Inh1, \**P*=0.0223; Inh2, \*\**P*=0.004). Data were analyzed using  $\chi^2$  test.

**Fig. S4.**

**Gene ontology for unique differentially expressed genes in the cell clusters sensitive to loss of KDM5A.** Gene ontology analysis on the exclusive DEGs in excitatory clusters CA1.1, CA1.4, CA3.4, and CA2 (A), and in inhibitory clusters PVALB+ and SST+ (B). Data from DEGs with an FDR-corrected *P*  $\leq 0.05$  and  $\log_2$  fold change  $\geq |0.3|$ .

**Fig. S5.**

**KDM5A regulates hundreds of genes in the hippocampus.** (A) Overlap between genes dysregulated in all *Kdm5a*<sup>-/-</sup> cells compared to all WT cells identified by snRNA-seq and DEGs identified by hippocampal bulk RNA-seq from El Hayek et al., 2020 (30), irrespective of their direction of dysregulation (*P*<2.2 x 10<sup>-16</sup>, OR=2.96) (top). Overlap between genes that are commonly upregulated (*P*=0.2078, OR=1.41) and commonly downregulated (*P*=1.33 x 10<sup>-5</sup>, OR=1.82) in both the snRNA-seq and the bulk RNA-seq datasets (bottom). DEGs changing in opposite directions between the two datasets are not captured in these Venn diagrams (bottom) (B) Overlap between mouse embryonic stem cell anti-KDM5A ChIP-seq peaks from Beshiri et al., 2012 (35) and DEGs identified by hippocampal bulk RNA-seq from El Hayek et al., 2020 (30) (top). Overlap between the ChIP-seq peaks and upregulated and downregulated DEGs (bottom). Possible direct targets of KDM5A are defined as DEGs that have an anti-KDM5A ChIP-seq peak, and possible indirect targets are defined as the remaining DEGs. (C) High-priority possible direct targets of KDM5A are defined as the genes that are commonly upregulated or commonly



downregulated in the bulk RNA-seq and the snRNA-seq datasets and that have KDM5A ChIP-seq peaks.

**Fig. S6.**

**KDM5A regulates the development of subtypes of CA2 and CA3 neurons.** *In situ* hybridization on brain tissue for *Rps6*, *Nme2*, *Shisa6*, and *Hs6st3* shows differential expression between WT and *Kdm5a*<sup>-/-</sup>. Hippocampal sections from WT (top) and *Kdm5a*<sup>-/-</sup> (bottom) mice show decreased expression of *Rps6* (A) and increased expression of *Nme2* (C) in the CA2 region of the hippocampus, decreased expression of *Shisa6* (E) in the CA3 region of the hippocampus, and increased expression of *Hs6st3* (G) in the CA1 region of the hippocampus in *Kdm5a*<sup>-/-</sup> compared to WT. The data is quantified in B, D, F, and H, respectively (WT n=3, *Kdm5a*<sup>-/-</sup> n=3, (B) \*P=0.0363, (D) \*P=0.0233, (F) \*\*P=0.003, (H) \*\*P=0.0068). Data were analyzed using unpaired t test. All values are mean ± SEM.

**Fig. S7.**

**KDM5A regulates the development of *Pvalb* and *Sst* subtypes of inhibitory neurons.** smFISH on brain tissue shows decreased number of cells expressing *Pvalb* and *Sst* in *Kdm5a*<sup>-/-</sup> hippocampi compared to WT. (A) Representative images from WT (left) and *Kdm5a*<sup>-/-</sup> (right) show decreased number of *Gad1*<sup>+</sup>*Pvalb*<sup>+</sup> and *Gad1*<sup>+</sup>*Sst*<sup>+</sup> cells in *Kdm5a*<sup>-/-</sup> compared to WT hippocampi. Scale bars, 50 μm. The data is quantified in B and C (WT n=3, *Kdm5a*<sup>-/-</sup> n=3, (B) \*P=0.0391, (C) \*P=0.0327). Data were analyzed using unpaired t test. All values are mean ± SEM.

**Fig. S8.**

**Developmental trajectory tracing using pseudotime analysis shows that the CA1.1 cluster has a more mature identity while the CA1.4 cluster has a younger identity.** (A) Pseudotime UMAP analysis of hippocampal cells colored by pseudotime (early, blue; late yellow). Data shown for one of two Monocle clusters that contained the majority of CA1 cells. (B) Mapping the pseudotime analysis onto the original UMAP of the 24 hippocampal clusters. (C) Enlarged view of the CA1 subclusters from panel (B).

**Fig. S9.**

**SATB2 expression decreases in the hippocampus following loss of KDM5A.** (A) Western blot analysis of hippocampal tissue shows a decrease in SATB2 in the *Kdm5a*<sup>-/-</sup> compared to WT. (B) Western blot quantification. SATB2 was normalized to actin (loading control) and the normalized values were plotted relative to WT (WT n=3, *Kdm5a*<sup>-/-</sup> n=3, \*P=0.0478). Data were analyzed using unpaired t test. All values are mean ± SEM.

**Table S1.**

**Differentially expressed genes between WT and *Kdm5a*<sup>-/-</sup> in all cells and in each of the 24 hippocampal cell clusters.** Genes with an FDR-corrected  $P \leq 0.05$  and  $\log_2$  fold change  $\geq |0.3|$  were selected as differentially expressed genes (DEGs). The pink tab (snRNA-seq DEGs) represents DEGs in all *Kdm5a*<sup>-/-</sup> cells compared to all WT cells. The “Overlap” tab shows the percentage of overlap between the DEGs in the six clusters sensitive to KDM5A loss. Purple tabs (CA1.1, CA1.4, CA2, CA3.4, Inh1, Inh2) correspond to cell clusters sensitive to loss of KDM5A. CA, *cornu ammonis* excitatory neurons; Inh, inhibitory neurons; OPC, oligodendrocyte progenitor cells; Oligo, oligodendrocytes; Astro, astrocytes.

**Table S2.**

**KDM5A signature genes.** DEGs with an FDR-corrected  $P \leq 0.05$  and  $\log_2$  fold change  $\geq |0.3|$  in the combined affected excitatory clusters (CA1.1, CA1.4, CA2, and CA3.4) and combined affected inhibitory clusters (Inh1 and Inh2) compared to unaffected excitatory and inhibitory clusters, respectively, were defined as KDM5A signature genes.

**Table S3.**

**DEGs and candidate KDM5A targets.** DEGs identified through bulk RNA-seq on WT and *Kdm5a*<sup>-/-</sup> hippocampi from El Hayek et al., 2020 (30). Common DEGs represent the overlap between dysregulated genes in all *Kdm5a*<sup>-/-</sup> cells compared to all WT cells from the hippocampal snRNA-seq and dysregulated genes from the hippocampal bulk RNA-seq. Genes with anti-KDM5A ChIP-seq peaks from Beshiri et al., 2012 (35) overlap with DEGs from the bulk RNA-seq dataset. Common DEGs from the snRNA-seq dataset are marked in yellow.

Figure S1

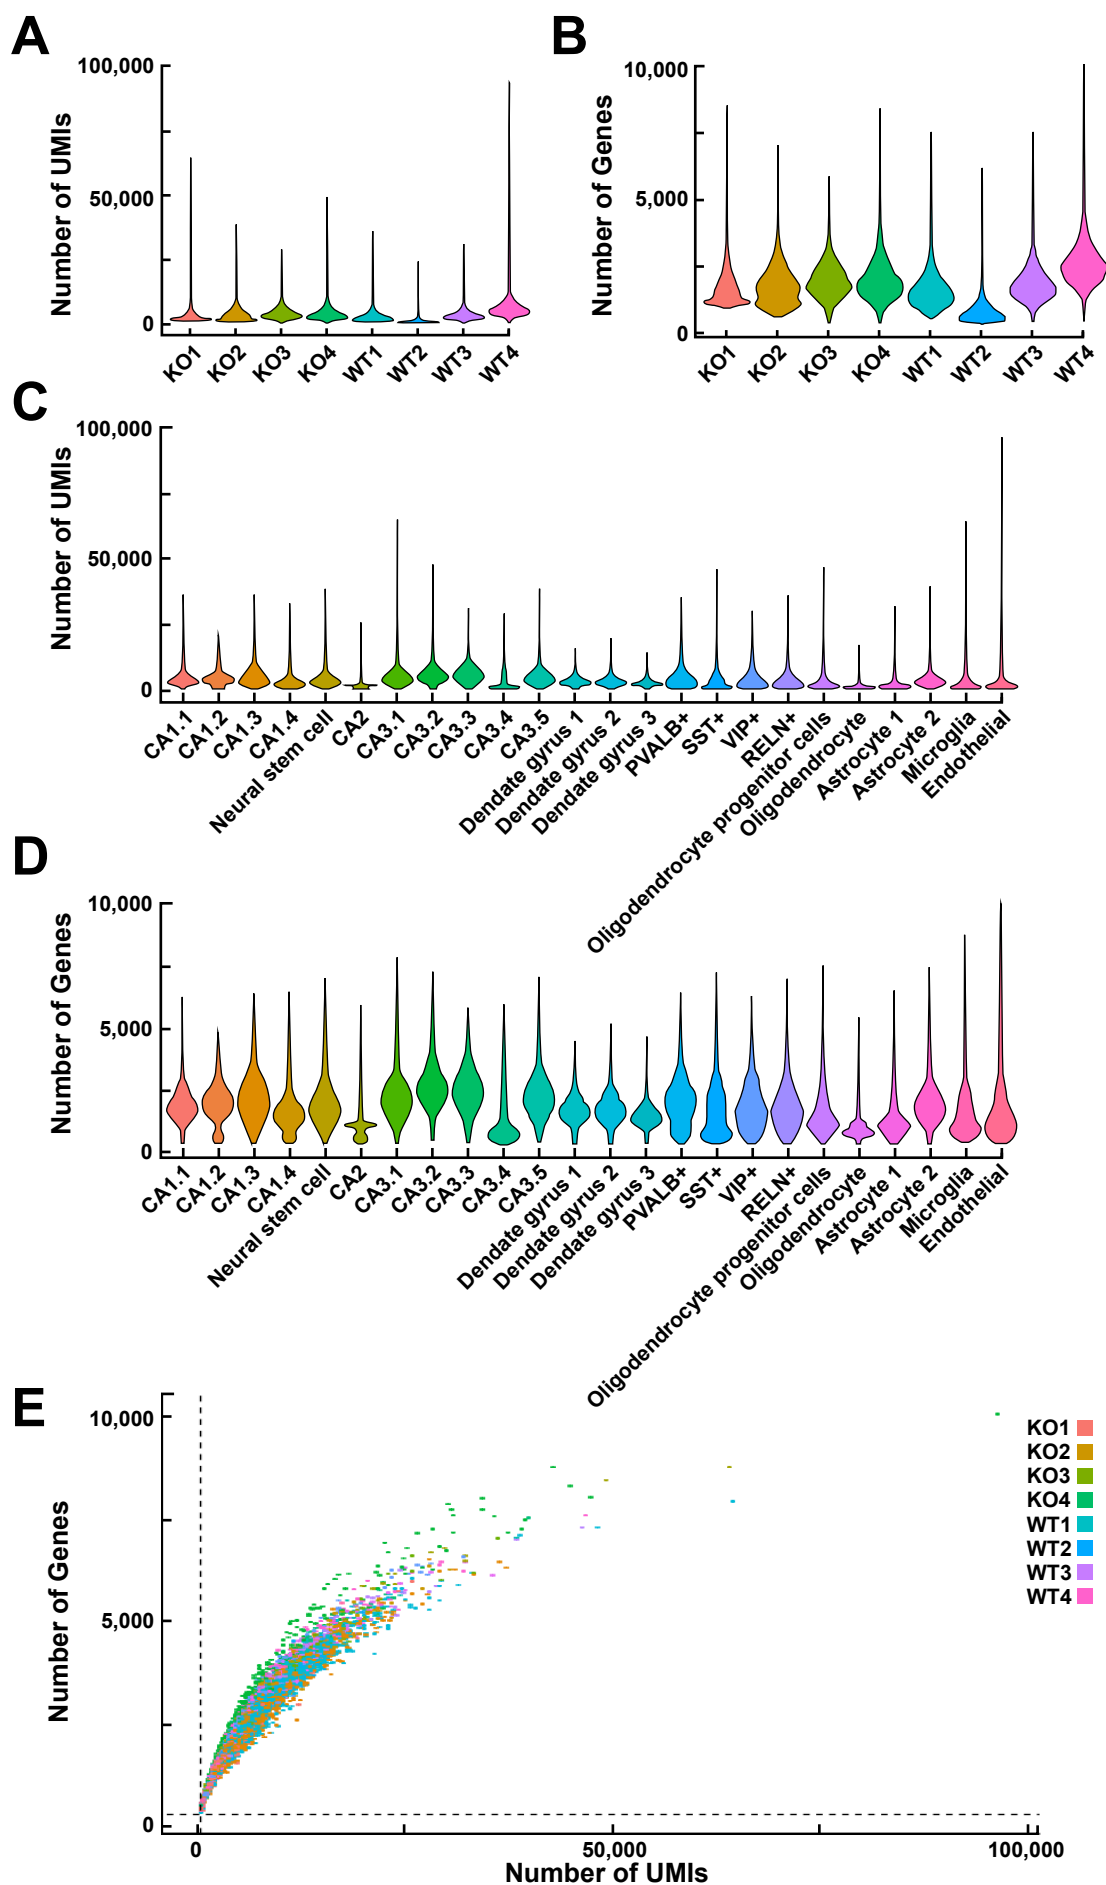

Figure S2

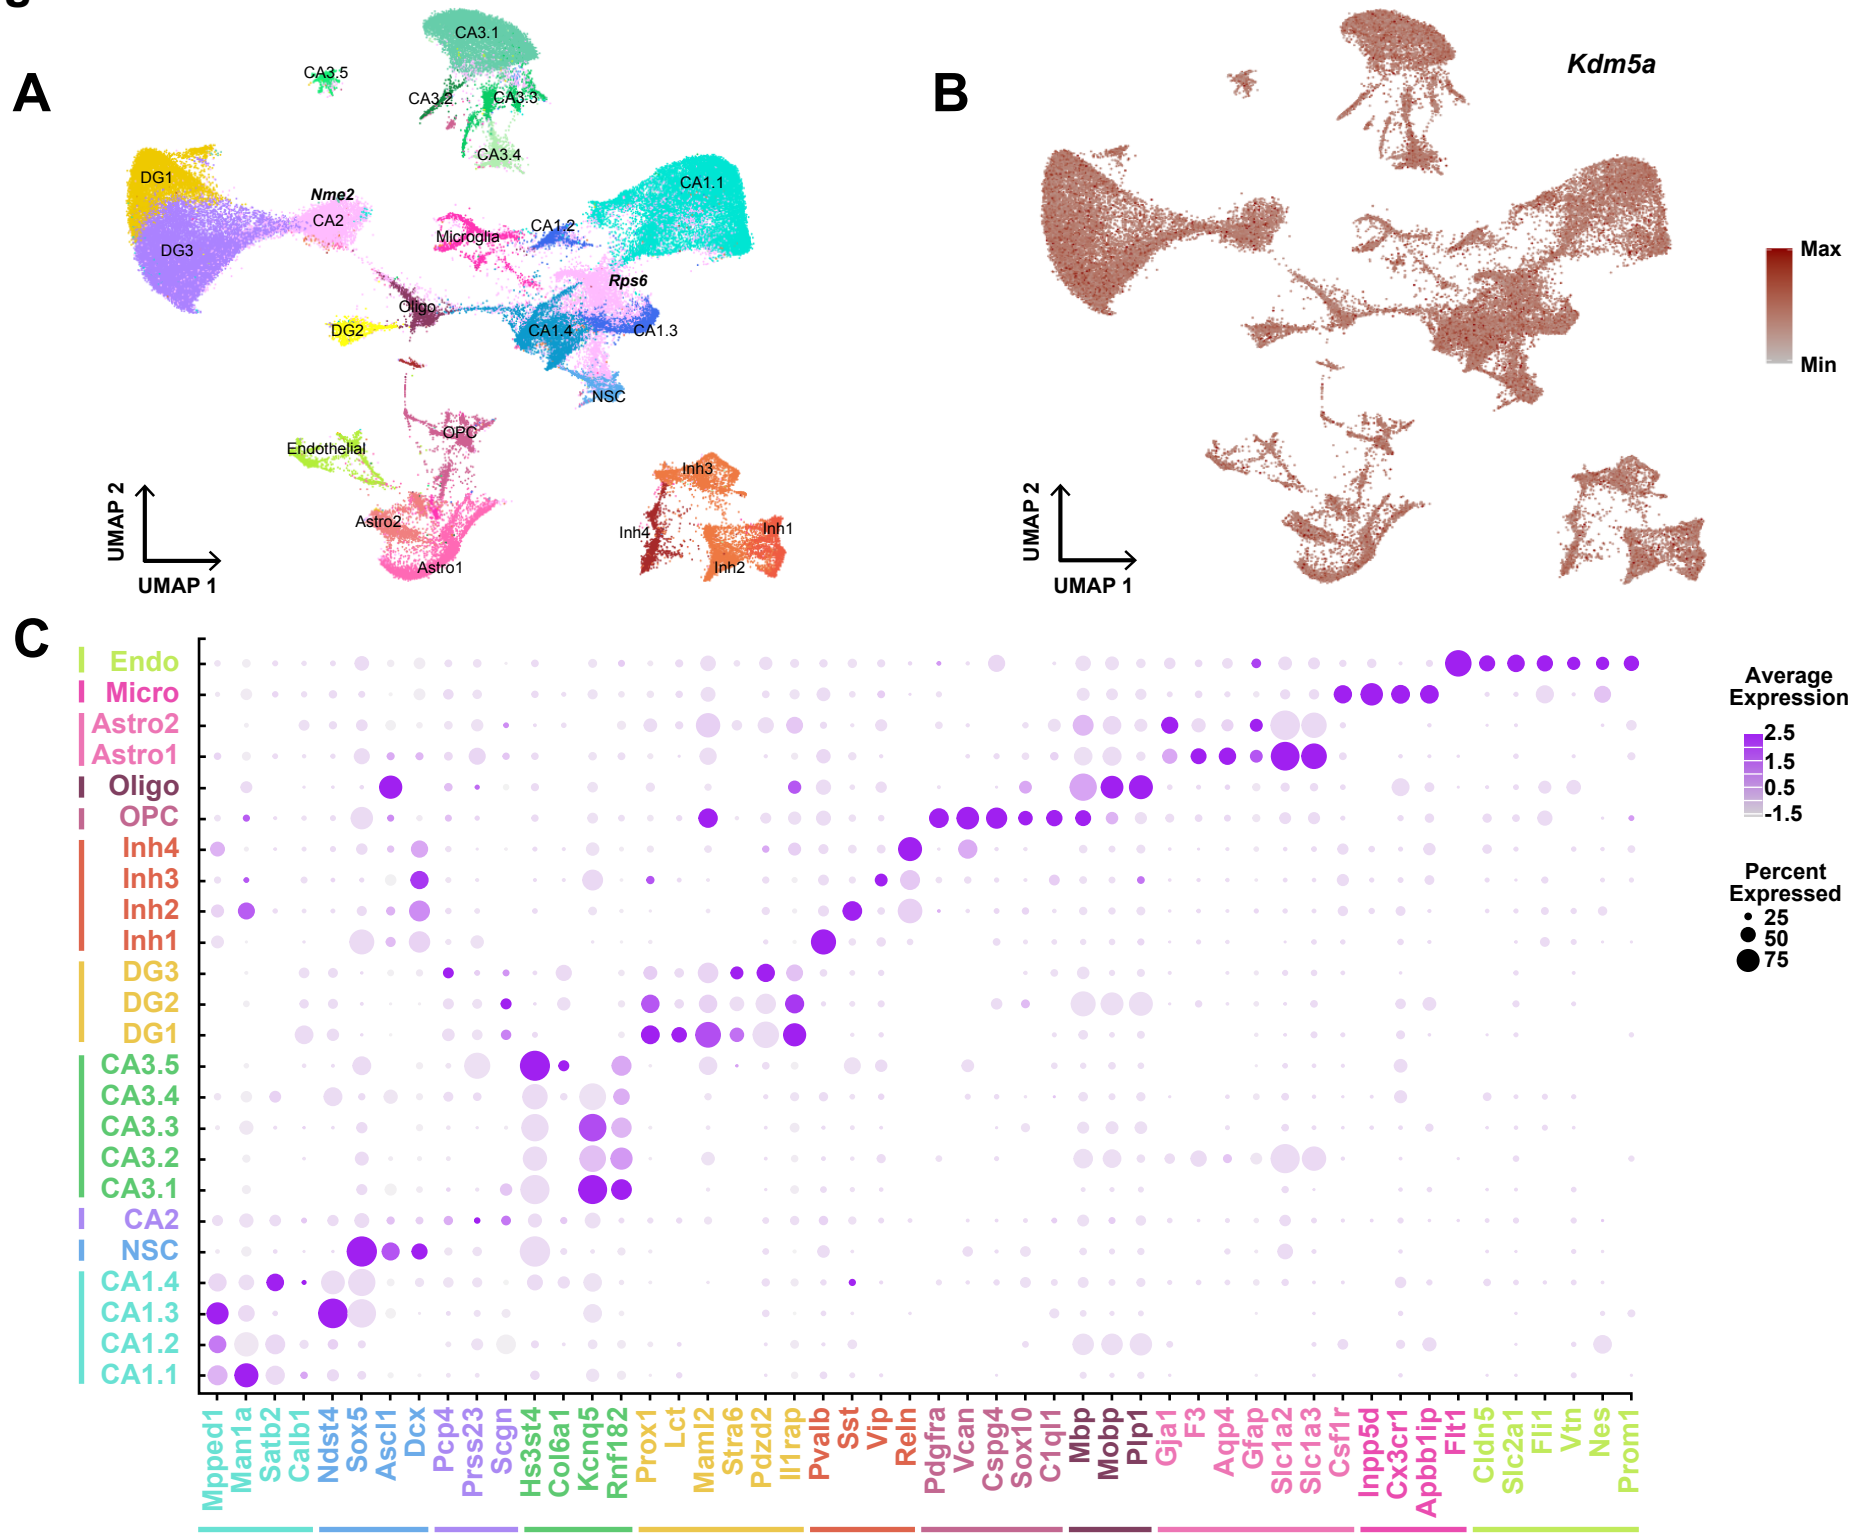

Figure S3

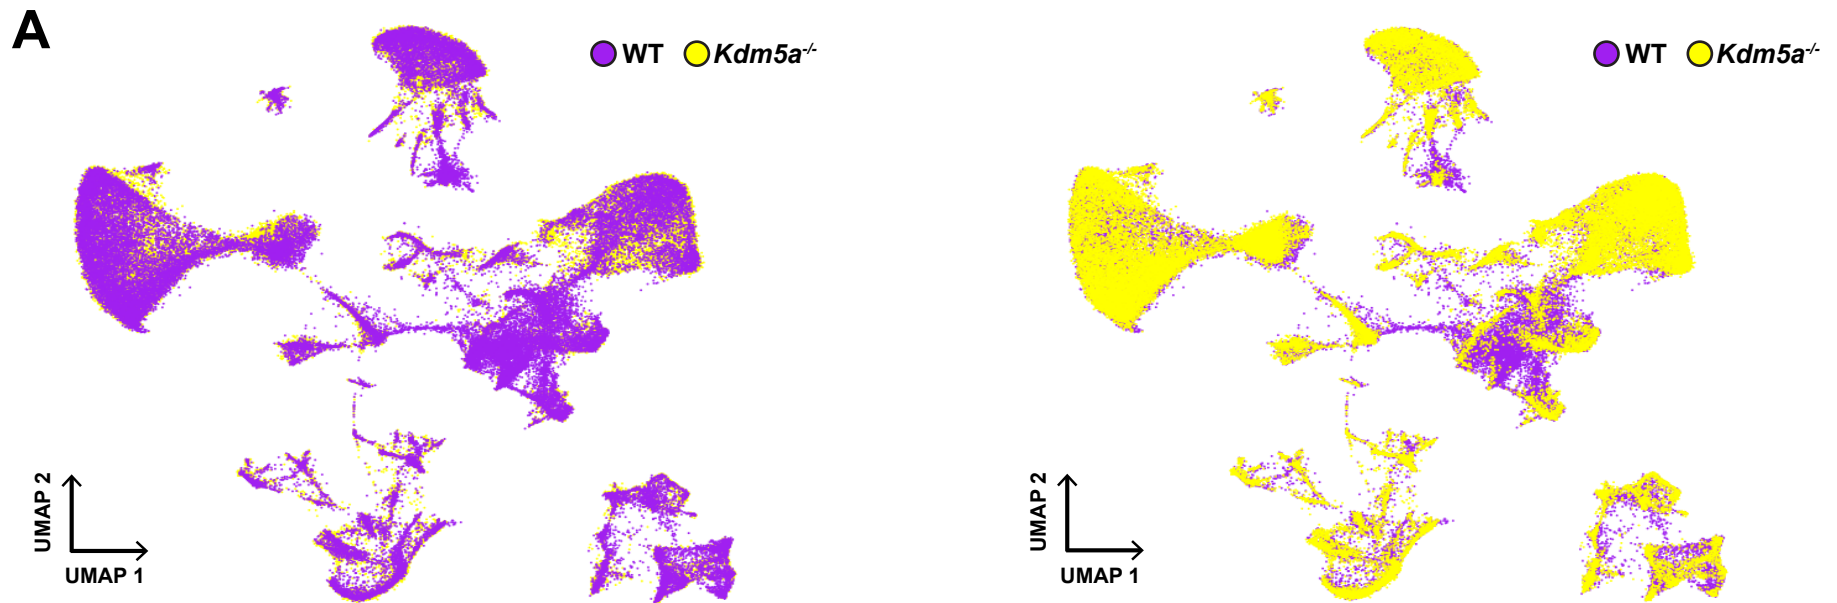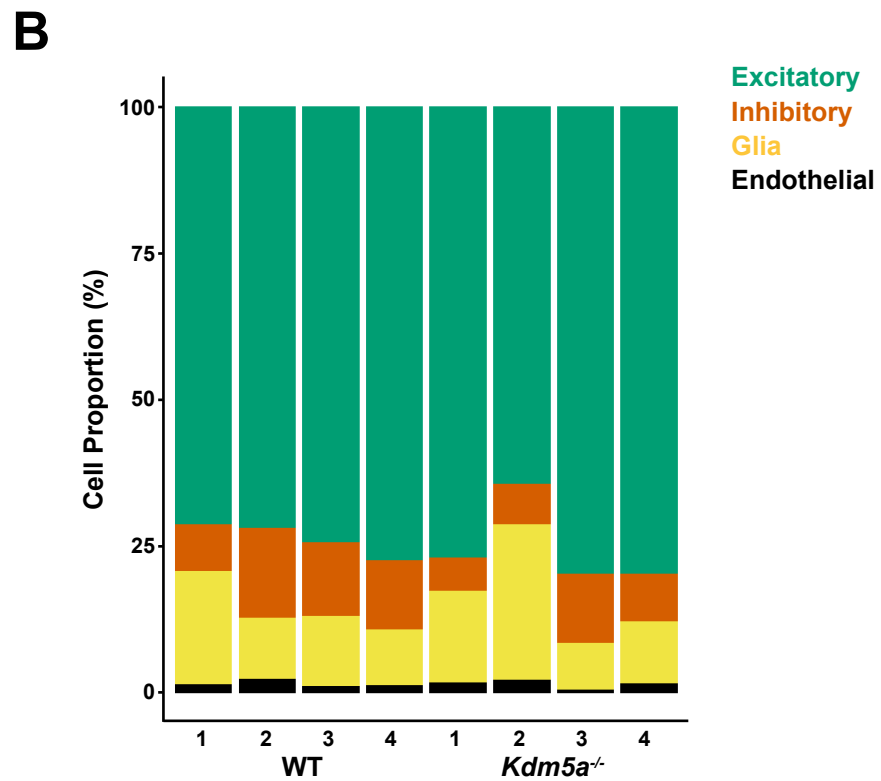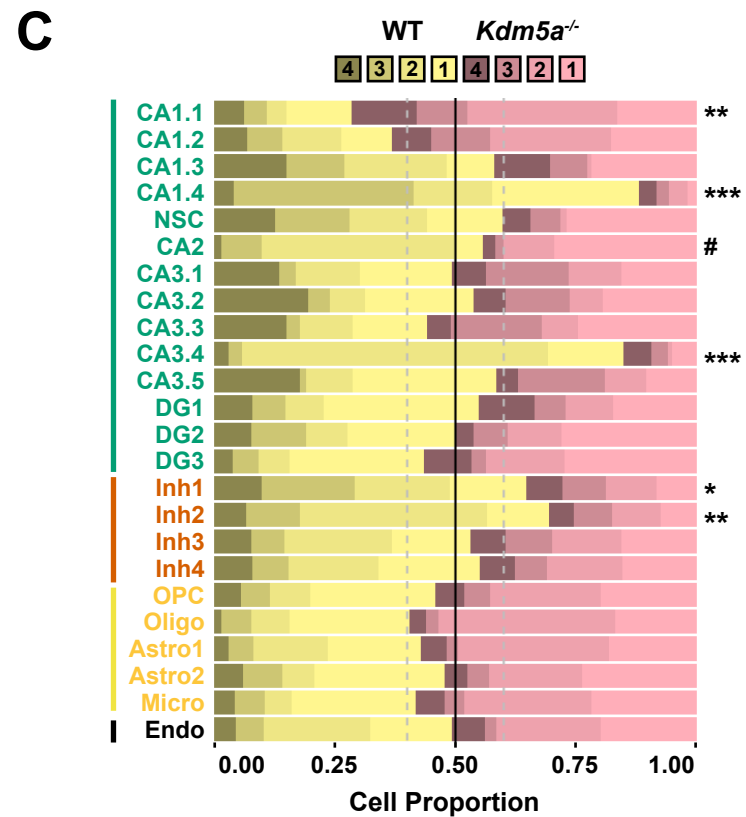

# Figure S4

## A

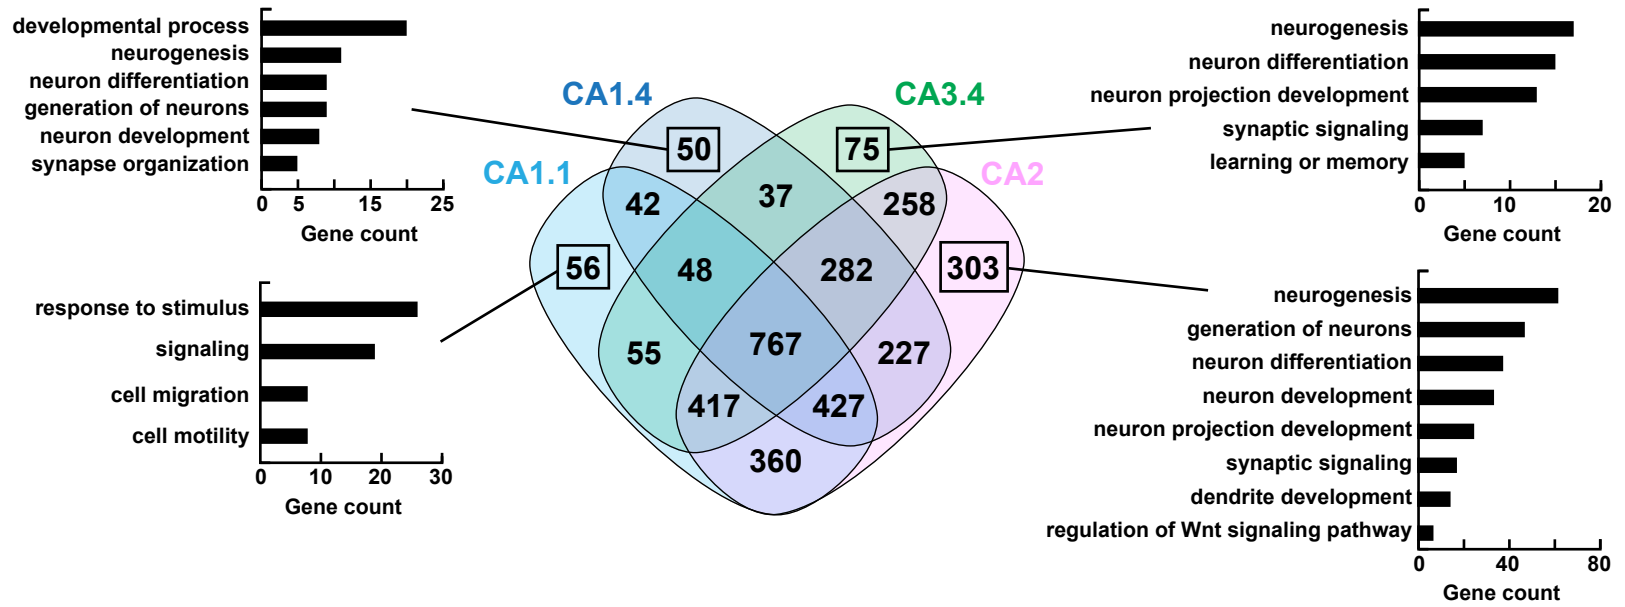

## B

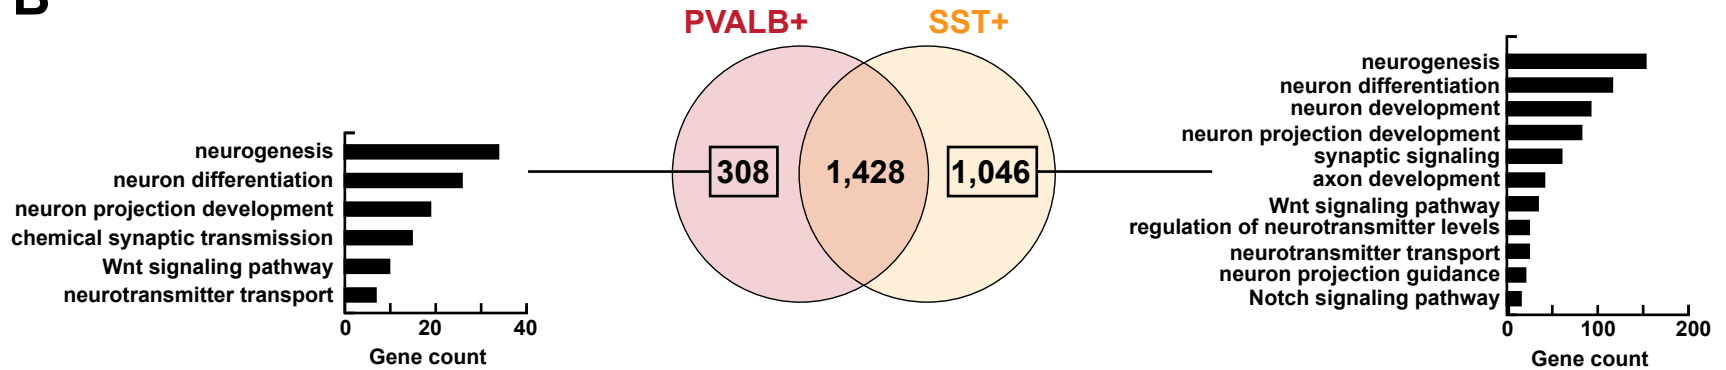

**Figure S5**

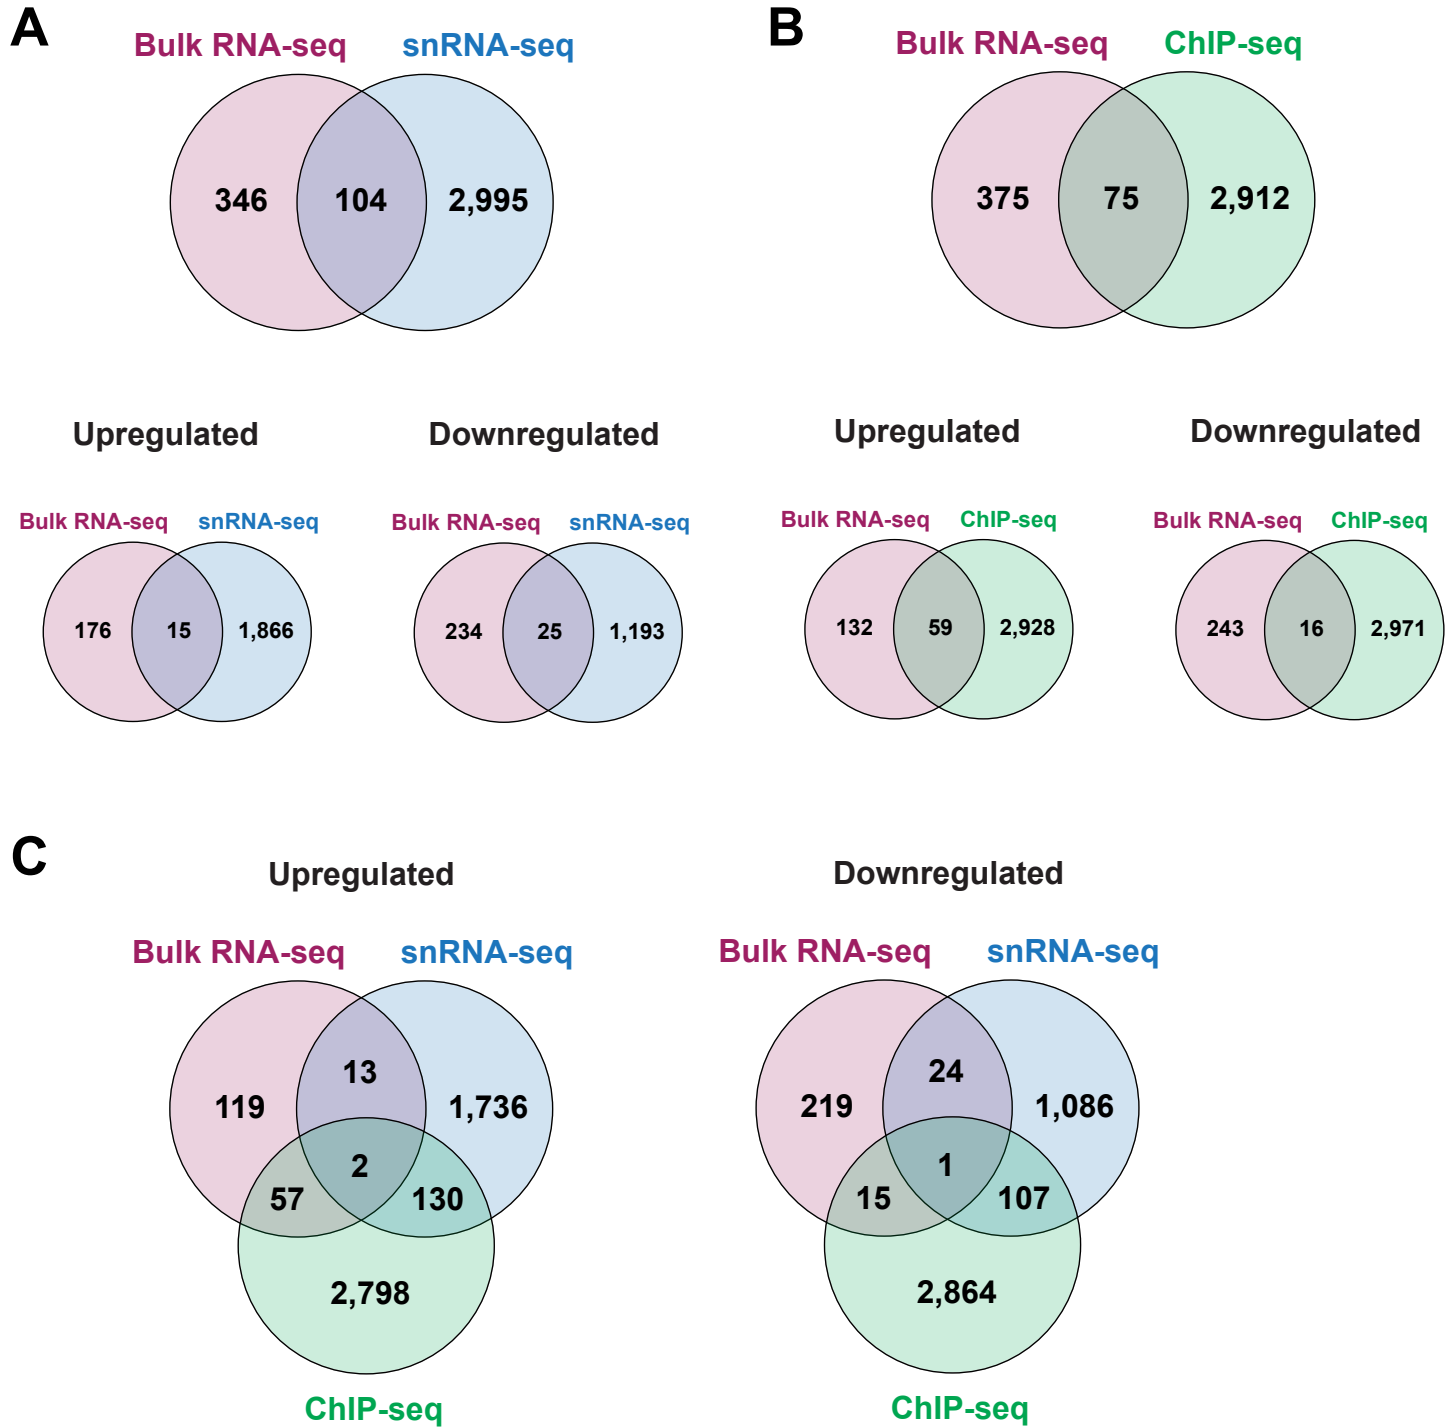

Figure S6

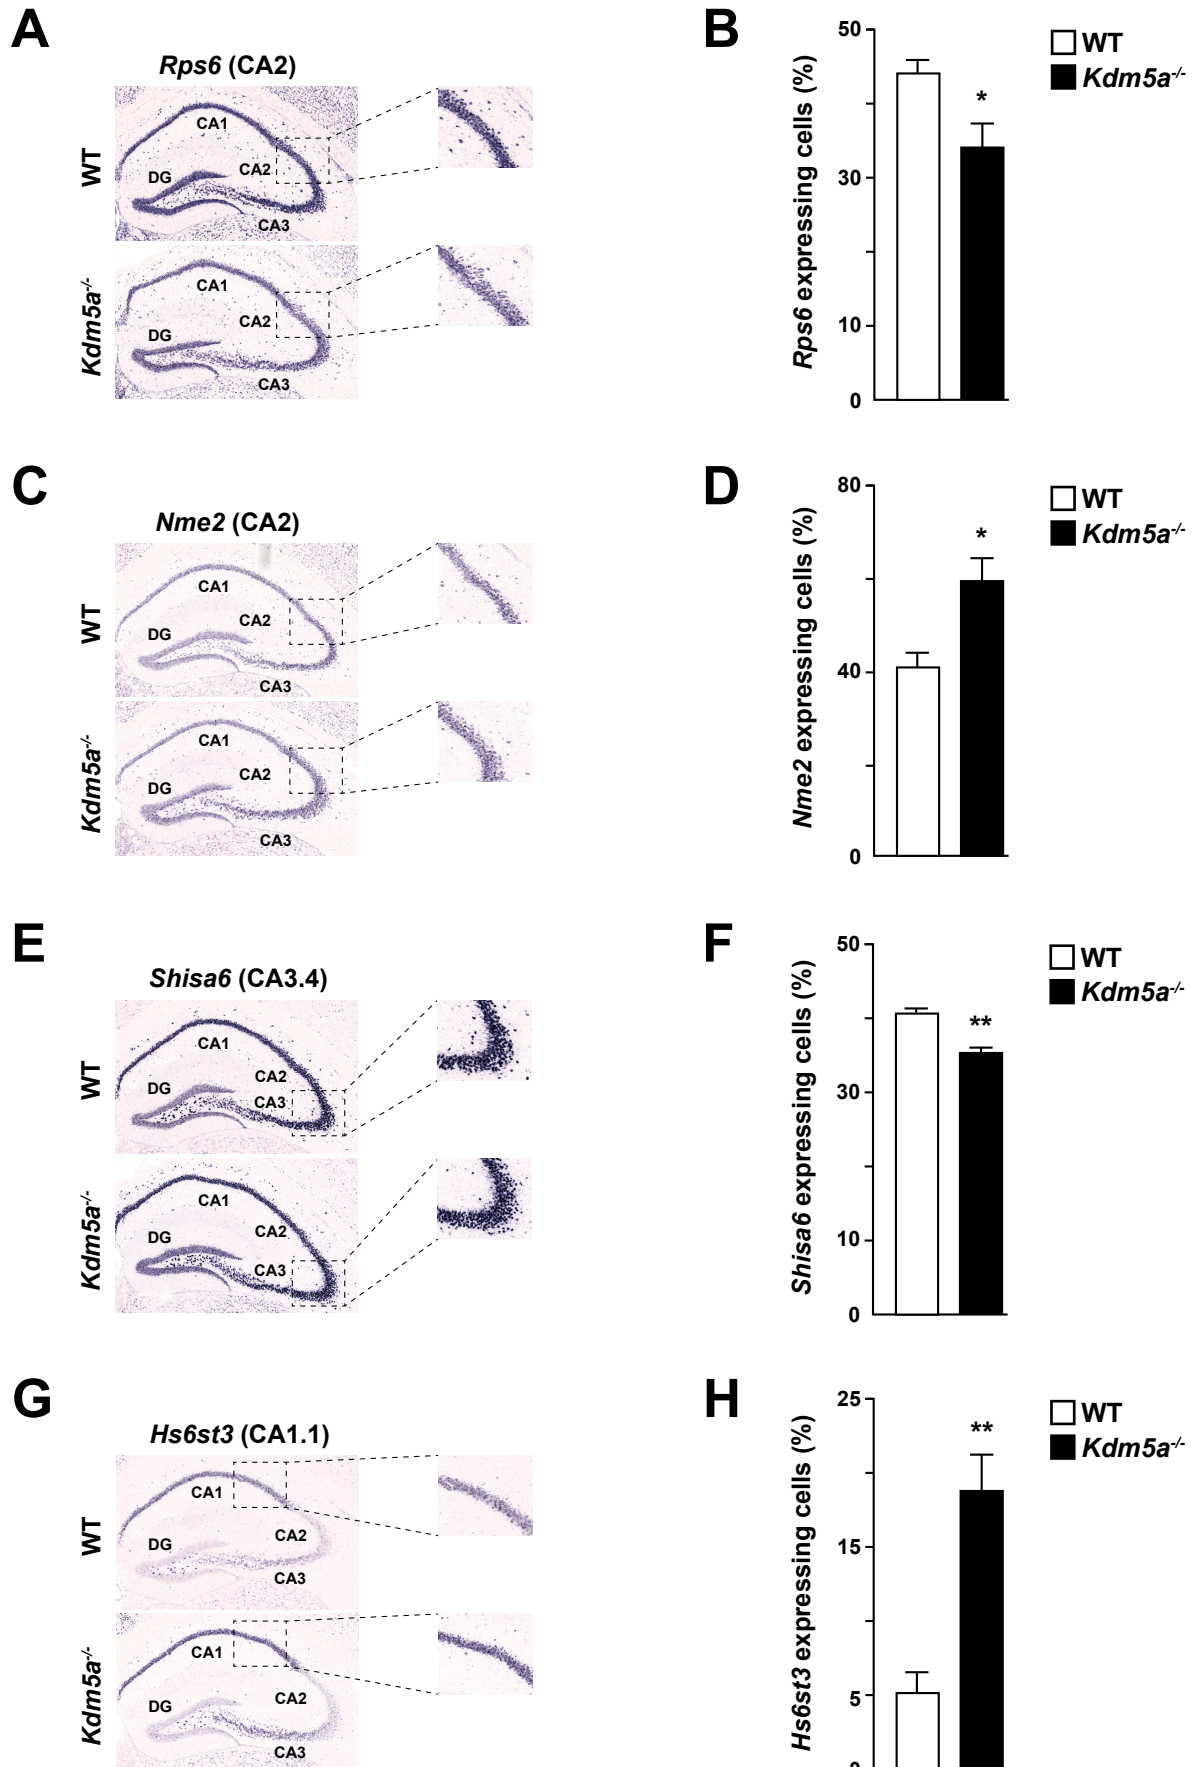



Figure S7

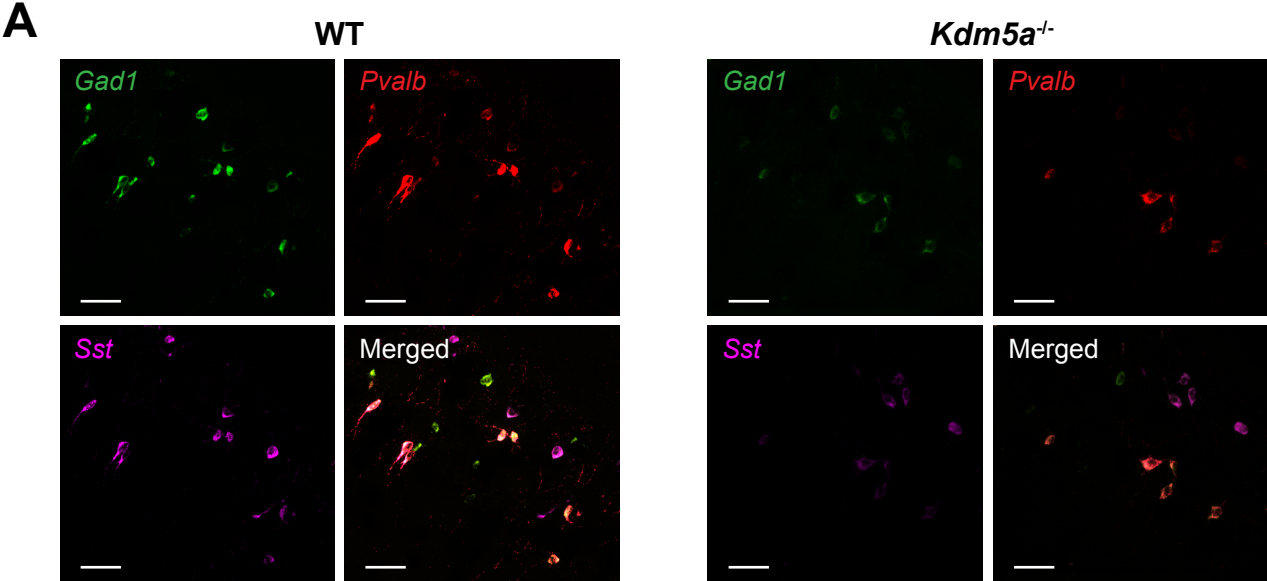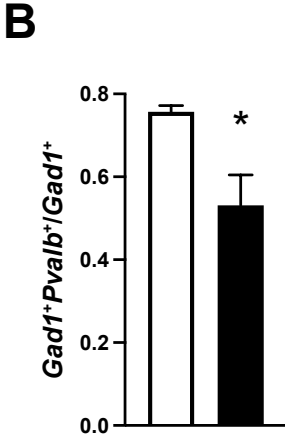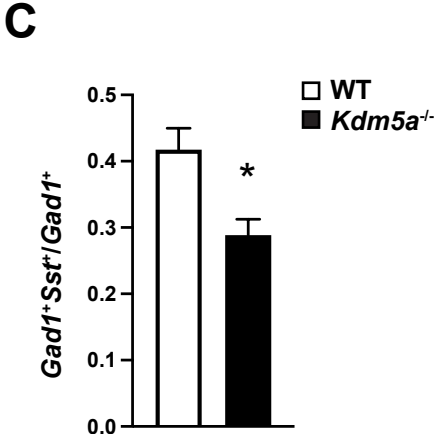

Figure S8

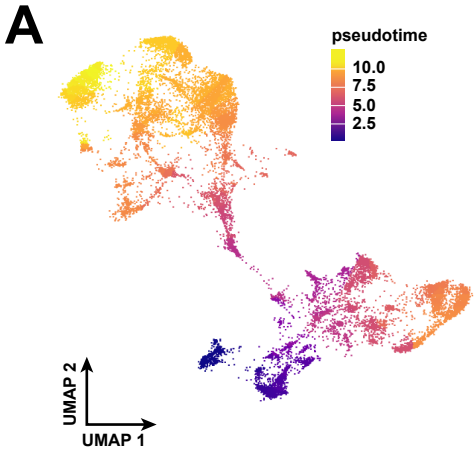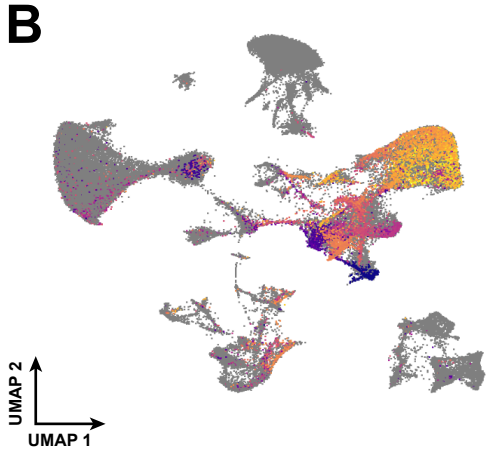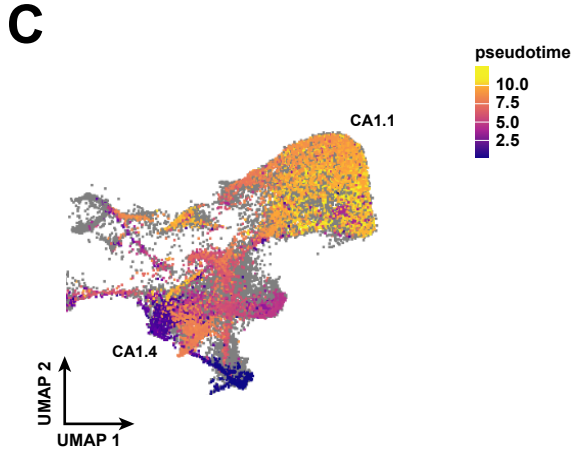

Figure S9

**A**

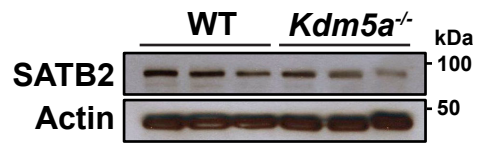

**B**

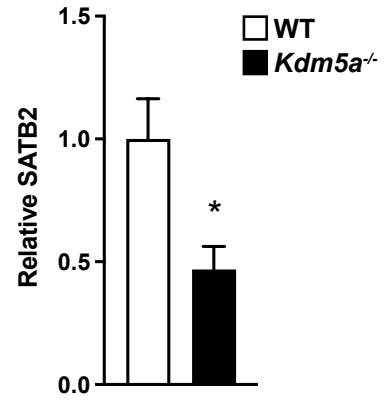

Supplement: sciadv.adi0074_sm.pdf [file sciadv.adi0074_sm.pdf]
